# Supplementary material for: Kinetic and thermodynamic effects of phosphorylation on p53 binding to MDM2
Source: PubMed Central journal article supplement (PMC6345774; doi:10.1038/s41598-018-36589-5), 2019-01-24

## Kinetic and thermodynamic effects of phosphorylation on p53 binding to MDM2

Shilpa Yadahalli, José L. Neira, Christopher M. Johnson, Yaw Sing Tan, Pamela J. E. Rowling, Anasuya Chattopadhyay, Chandra S. Verma and Laura S. Itzhaki

### SUPPLEMENTARY TABLES

The numbers in parenthesis after the chemical shifts of the H $\alpha$  atoms correspond to the conformational shifts.

Table S1: Chemical shifts ( $\delta$ , ppm from TSP) of p53 wild-type (pH 4.5, 283 K)

|       | NH   | H $\alpha$   | H $\beta$ 2 | H $\beta$ 3 | H $\gamma$ 2 | H $\gamma$ 3 | H $\delta$ 2                                                              | H $\delta$ 3 | H $\epsilon$ | H $\epsilon$ | H $\zeta$ |
|-------|------|--------------|-------------|-------------|--------------|--------------|---------------------------------------------------------------------------|--------------|--------------|--------------|-----------|
| Glu17 | 8.44 | 4.31 (0.02)  | 1.91        |             | 2.27         |              |                                                                           |              |              |              |           |
| Thr18 | 8.30 | 4.29 (-0.06) | 4.15        |             | 1.13 (Me)    |              |                                                                           |              |              |              |           |
| Phe19 | 8.39 | 4.61 (-0.05) | 3.05        | 3.15        |              |              | 7.20                                                                      |              | 7.30         |              |           |
| Ser20 | 8.20 | 4.31 (-0.19) | 3.72        | 3.85        |              |              |                                                                           |              |              |              |           |
| Asp21 | 8.34 | 4.56 (-0.20) | 2.63        |             |              |              |                                                                           |              |              |              |           |
| Leu22 | 8.02 | 4.11 (-0.27) | 1.43        |             | 1.43         |              | 0.82 (Me)                                                                 |              |              |              |           |
| Trp23 | 7.90 | 4.54 (-0.16) | 3.30        |             |              |              | 10.22 (NH); 7.26 (C2H); 7.47 (C7H); 7.57 (C4H); 7.18 (C5H);<br>7.28 (C6H) |              |              |              |           |
| Lys24 | 7.61 | 4.04 (-0.32) | 1.61        |             | 1.11         |              |                                                                           |              | 2.93         |              |           |
| Leu25 | 7.90 | 4.27 (-0.11) | 1.61        |             | 1.61         |              | 0.91 (Me)                                                                 |              |              |              |           |
| Leu26 | 8.02 | 4.61 (0.23)  | 1.63        |             | 1.63         |              | 0.84 (Me)                                                                 |              |              |              |           |
| Pro27 |      | 4.38 (-0.06) | 2.06        |             | 2.28         |              | 3.68                                                                      | 3.81         |              |              |           |
| Glu28 | 8.77 | 4.27 (-0.02) | 2.02        |             | 2.34         |              |                                                                           |              |              |              |           |
| Asn29 | 8.41 | 4.68 (-0.07) | 2.75        |             |              |              |                                                                           |              |              |              |           |

Table S2: Chemical shifts ( $\delta$ , ppm from TSP) of p53-pTpS (pH 4.5, 283 K)

|        | NH   | H $\alpha$   | H $\beta$ 2 | H $\beta$ 3 | H $\gamma$ 2 | H $\gamma$ 3 | H $\delta$ 2 | H $\delta$ 3                                                              | H $\epsilon$ | H $\epsilon$ | H $\zeta$ |
|--------|------|--------------|-------------|-------------|--------------|--------------|--------------|---------------------------------------------------------------------------|--------------|--------------|-----------|
| Glu17  | 8.42 | 4.32 (0.03)  |             | 1.90        |              | 2.34         |              |                                                                           |              |              |           |
| pThr18 | 8.40 | 4.37 (-0.06) |             | 4.53        |              | 1.20 (Me)    |              |                                                                           |              |              |           |
| Phe19  | 8.39 | 4.70 (0.04)  | 2.97        | 3.20        |              |              |              | 7.22                                                                      |              |              |           |
| pSer20 | 8.60 | 4.44 (-0.16) | 4.10        | 4.17        |              |              |              |                                                                           |              |              |           |
| Asp21  | 8.39 | 4.58 (-0.18) |             | 2.68        |              |              |              |                                                                           |              |              |           |
| Leu22  | 8.04 | 4.10 (-0.28) |             | 1.56        |              | 1.39         |              | 0.85 (Me)                                                                 |              |              |           |
| Trp23  | 7.90 | 4.56 (-0.14) |             | 3.32        |              |              |              | 10.22 (NH); 7.30 (C2H); 7.47 (C7H); 7.57 (C4H); 7.18 (C5H);<br>7.28 (C6H) |              |              |           |
| Lys24  | 7.55 | 4.05 (-0.31) |             | 1.63        |              | 1.10         |              |                                                                           |              | 2.93         |           |
| Leu25  | 7.89 | 4.29 (-0.09) |             | 1.63        |              | 1.63         |              | 0.90 (Me)                                                                 |              |              |           |
| Leu26  | 8.01 | 4.63 (0.25)  |             | 1.63        |              | 1.63         |              | 0.84 (Me)                                                                 |              |              |           |
| Pro27  |      | 4.35 (-0.09) |             | 2.05        |              | 2.32         |              | 3.69                                                                      | 3.84         |              |           |
| Glu28  | 8.77 | 4.24 (-0.05) |             | 2.03        |              | 2.37         |              |                                                                           |              |              |           |
| Asn29  | 8.41 | 4.70 (-0.05) |             | 2.78        |              |              |              |                                                                           |              |              |           |

Table S3: Chemical shifts ( $\delta$ , ppm from TSP) of p53-pT (pH 4.5, 283 K)

|        | NH   | H $\alpha$   | H $\beta$ 2 | H $\beta$ 3 | H $\gamma$ 2 | H $\gamma$ 3 | H $\delta$ 2 | H $\delta$ 3                                                              | H $\epsilon$ | H $\epsilon$ | H $\zeta$ |
|--------|------|--------------|-------------|-------------|--------------|--------------|--------------|---------------------------------------------------------------------------|--------------|--------------|-----------|
| Glu17  | 8.42 | 4.29 (0.0)   |             | 1.92        |              | 2.30         |              |                                                                           |              |              |           |
| pThr18 | 8.44 | 4.33 (-0.10) |             | 4.53        |              | 1.17 (Me)    |              |                                                                           |              |              |           |
| Phe19  | 8.40 | 4.69 (0.03)  | 2.99        | 3.20        |              |              |              | 7.21                                                                      |              |              |           |
| Ser20  | 8.31 | 4.27 (-0.23) | 3.80        | 3.89        |              |              |              |                                                                           |              |              |           |
| Asp21  | 8.43 | 4.59 (-0.17) |             | 2.64        |              |              |              |                                                                           |              |              |           |
| Leu22  | 8.01 | 4.10 (-0.28) |             | 1.54        |              | 1.39         |              | 0.85 (Me)                                                                 |              |              |           |
| Trp23  | 7.88 | 4.52 (-0.18) |             | 3.28        |              |              |              | 10.24 (NH); 7.29 (C2H); 7.47 (C7H); 7.57 (C4H); 7.22 (C5H);<br>7.29 (C6H) |              |              |           |
| Lys24  | 7.59 | 4.05 (-0.31) |             | 1.58        |              | 1.09         |              |                                                                           |              | 2.90         |           |
| Leu25  | 7.89 | 4.31 (-0.07) |             | 1.62        |              | 1.62         |              | 0.90 (Me)                                                                 |              |              |           |
| Leu26  | 8.02 | 4.61 (0.23)  |             | 1.66        |              | 1.66         |              | 0.90 (Me)                                                                 |              |              |           |
| Pro27  |      | 4.40 (-0.04) | 1.98        | 2.04        |              | 2.31         | 3.69         | 3.84                                                                      |              |              |           |
| Glu28  | 8.76 | 4.24 (-0.05) |             | 2.01        |              | 2.35         |              |                                                                           |              |              |           |
| Asn29  | 8.41 | 4.67 (-0.08) |             | 2.77        |              |              |              |                                                                           |              |              |           |

Table S4: Chemical shifts ( $\delta$ , ppm from TSP) of p53-pS (pH 4.5, 283 K)

|        | NH   | H $\alpha$   | H $\beta$ 2 | H $\beta$ 3 | H $\gamma$ 2 | H $\gamma$ 3 | H $\delta$ 2                                                              | H $\delta$ 3 | H $\epsilon$ | H $\epsilon$ | H $\zeta$ |
|--------|------|--------------|-------------|-------------|--------------|--------------|---------------------------------------------------------------------------|--------------|--------------|--------------|-----------|
| Glu17  | 8.43 | 4.35 (0.06)  | 1.90        |             | 2.31         |              |                                                                           |              |              |              |           |
| Thr18  | 8.27 | 4.34 (-0.01) | 4.38        |             | 1.18 (Me)    |              |                                                                           |              |              |              |           |
| Phe19  | 8.57 | 4.53 (-0.13) | 3.08        |             |              |              | 7.28                                                                      |              | 7.35         |              |           |
| pSer20 | 8.66 | 4.35 (-0.25) | 4.13        |             |              |              |                                                                           |              |              |              |           |
| Asp21  | 8.15 | 4.51 (-0.25) | 2.69        |             |              |              |                                                                           |              |              |              |           |
| Leu22  | 7.97 | 4.04 (-0.34) | 1.61        |             | 1.37         |              | 0.84 (Me)                                                                 |              |              |              |           |
| Trp23  | 7.93 | 4.56 (-0.14) | 3.25        |             |              |              | 10.16 (NH); 7.29 (C2H); 7.47 (C7H); 7.59 (C4H); 7.22 (C5H);<br>7.28 (C6H) |              |              |              |           |
| Lys24  | 7.55 | 4.04 (-0.32) | 1.65        |             | 1.17         |              |                                                                           |              | 2.90         |              |           |
| Leu25  | 7.83 | 4.29 (-0.09) | 1.68        |             | 1.68         |              | 0.90 (Me)                                                                 |              |              |              |           |
| Leu26  | 7.93 | 4.56 (0.18)  | 1.61        |             | 1.61         |              | 0.90 (Me)                                                                 |              |              |              |           |
| Pro27  |      | 4.38 (-0.06) | 2.05        |             | 2.32         |              | 3.67                                                                      | 3.84         |              |              |           |
| Glu28  | 8.78 | 4.23 (-0.06) | 2.01        |             | 2.31         |              |                                                                           |              |              |              |           |
| Asn29  | 8.36 | 4.70 (-0.05) | 2.74        |             |              |              |                                                                           |              |              |              |           |

Table S5: Chemical shifts ( $\delta$ , ppm from TSP) of p53-E18 (pH 4.5, 283 K)

|       | NH   | H $\alpha$   | H $\beta$ 2 | H $\beta$ 3 | H $\gamma$ 2 | H $\gamma$ 3 | H $\delta$ 2                                                              | H $\delta$ 3 | H $\epsilon$ | H $\epsilon$ | H $\zeta$ |
|-------|------|--------------|-------------|-------------|--------------|--------------|---------------------------------------------------------------------------|--------------|--------------|--------------|-----------|
| Glu17 | 8.42 | 4.21 (-0.08) | 1.88        |             | 2.27         |              |                                                                           |              |              |              |           |
| Glu18 | 8.62 | 4.12 (-0.17) | 1.81        | 1.99        | 2.16         |              |                                                                           |              |              |              |           |
| Phe19 | 8.21 | 4.61 (-0.05) | 2.98        | 3.18        |              |              | 7.21                                                                      |              | 7.32         |              |           |
| Ser20 | 8.12 | 4.33 (-0.17) | 3.75        | 3.86        |              |              |                                                                           |              |              |              |           |
| Asp21 | 8.44 | 4.55 (-0.21) | 2.63        |             |              |              |                                                                           |              |              |              |           |
| Leu22 | 8.00 | 4.12 (-0.26) | 1.55        |             | 1.55         |              | 0.90 (Me)                                                                 |              |              |              |           |
| Trp23 | 7.86 | 4.50 (-0.20) | 3.33        |             |              |              | 10.23 (NH); 7.28 (C2H); 7.48 (C7H); 7.57 (C4H); 7.18 (C5H);<br>7.28 (C6H) |              |              |              |           |
| Lys24 | 7.60 | 4.02 (-0.34) | 1.59        |             | 1.10         |              |                                                                           |              | 2.91         |              |           |
| Leu25 | 7.87 | 4.26 (-0.12) | 1.59        |             | 1.59         |              | 0.86 (Me)                                                                 |              |              |              |           |
| Leu26 | 8.00 | 4.63 (0.25)  | 1.63        |             | 1.63         |              | 0.92 (Me)                                                                 |              |              |              |           |
| Pro27 |      | 4.39 (-0.05) | 1.98        |             | 2.30         |              | 3.66                                                                      | 3.83         |              |              |           |
| Glu28 | 8.76 | 4.21 (-0.08) | 1.98        |             | 2.30         |              |                                                                           |              |              |              |           |
| Asn29 | 8.38 | 4.68 (-0.07) | 2.74        |             |              |              |                                                                           |              |              |              |           |

Table S6: Chemical shifts ( $\delta$ , ppm from TSP) of p53-D20 (pH 4.5, 283 K)

|       | NH   | H $\alpha$   | H $\beta$ 2 | H $\beta$ 3 | H $\gamma$ 2 | H $\gamma$ 3 | H $\delta$ 2                                                             | H $\delta$ 3 | H $\epsilon$ | H $\epsilon$ | H $\zeta$ |
|-------|------|--------------|-------------|-------------|--------------|--------------|--------------------------------------------------------------------------|--------------|--------------|--------------|-----------|
| Glu17 | 8.41 | 4.29 (0.0)   | 1.90        |             | 2.27         |              |                                                                          |              |              |              |           |
| Thr18 | 8.25 | 4.33 (-0.02) | 4.22        |             | 1.14 (Me)    |              |                                                                          |              |              |              |           |
| Phe19 | 8.42 | 4.57 (-0.09) | 3.02        | 3.12        |              |              | 7.22                                                                     |              | 7.34         |              |           |
| Asp20 | 8.31 | 4.51 (-0.25) | 2.67        |             |              |              |                                                                          |              |              |              |           |
| Asp21 | 8.23 | 4.55 (-0.21) | 2.65        |             |              |              |                                                                          |              |              |              |           |
| Leu22 | 8.10 | 4.09 (-0.31) | 1.55        |             | 1.34         |              | 0.83 (Me)                                                                |              |              |              |           |
| Trp23 | 7.93 | 4.51 (-0.19) | 3.28        |             |              |              | 10.21 (NH); 7.27 (C2H); 7.47 (C7H); 7.57 (C4H); 7.18 (C5H);<br>7.27(C6H) |              |              |              |           |
| Lys24 | 7.57 | 4.02 (-0.34) | 1.58        |             | 1.07         |              |                                                                          |              | 2.90         |              |           |
| Leu25 | 7.86 | 4.26 (-0.12) | 1.57        |             | 1.57         |              | 0.87 (Me)                                                                |              |              |              |           |
| Leu26 | 7.99 | 4.58 (0.20)  | 1.58        |             | 1.58         |              | 0.90 (Me)                                                                |              |              |              |           |
| Pro27 |      | 4.37 (-0.07) | 2.03        |             | 2.31         |              | 3.67                                                                     | 3.82         |              |              |           |
| Glu28 | 8.77 | 4.23 (-0.06) | 2.00        |             | 2.33         |              |                                                                          |              |              |              |           |
| Asn29 | 8.39 | 4.70 (-0.05) | 2.76        |             |              |              |                                                                          |              |              |              |           |

Table S7: Chemical shifts ( $\delta$ , ppm from TSP) of p3 p53-E18-D20 (pH 4.5, 283 K)

|       | NH   | H $\alpha$   | H $\beta$ 2 | H $\beta$ 3 | H $\gamma$ 2 | H $\gamma$ 3 | H $\delta$ 2 | H $\delta$ 3                                                              | H $\epsilon$ | H $\epsilon$ | H $\zeta$ |
|-------|------|--------------|-------------|-------------|--------------|--------------|--------------|---------------------------------------------------------------------------|--------------|--------------|-----------|
| Glu17 | 8.38 | 4.22 (-0.07) |             | 1.86        |              | 2.37         |              |                                                                           |              |              |           |
| Glu18 | 8.55 | 4.22 (-0.07) |             | 1.86        |              | 2.16         |              |                                                                           |              |              |           |
| Phe19 | 8.27 | 4.57 (-0.09) | 2.98        |             | 3.18         |              |              | 7.22                                                                      |              | 7.34         |           |
| Asp20 | 8.29 | 4.55 (-0.21) |             | 2.63        |              |              |              |                                                                           |              |              |           |
| Asp21 | 8.26 | 4.57 (-0.19) |             | 2.71        |              |              |              |                                                                           |              |              |           |
| Leu22 | 8.09 | 4.10 (-0.28) |             | 1.57        |              | 1.37         |              | 0.84 (Me)                                                                 |              |              |           |
| Trp23 | 7.91 | 4.51 (-0.19) |             | 3.30        |              |              |              | 10.22 (NH); 7.29 (C2H); 7.49 (C7H); 7.57 (C4H); 7.18 (C5H);<br>7.28 (C6H) |              |              |           |
| Lys24 | 7.57 | 4.00 (-0.36) |             | 1.57        |              | 1.04         |              |                                                                           |              | 2.89         |           |
| Leu25 | 7.87 | 4.26 (-0.12) |             | 1.60        |              | 1.63         |              | 0.88 (Me)                                                                 |              |              |           |
| Leu26 | 8.00 | 4.60 (0.22)  |             | 1.63        |              | 1.60         |              | 0.92 (Me)                                                                 |              |              |           |
| Pro27 |      | 4.38 (-0.06) |             | 2.04        |              | 2.27         |              | 3.64                                                                      | 3.84         |              |           |
| Glu28 | 8.75 | 4.24 (-0.05) |             | 1.98        |              | 2.34         |              |                                                                           |              |              |           |
| Asn29 | 8.40 | 4.69 (-0.06) |             | 2.77        |              |              |              |                                                                           |              |              |           |

Table S8: Chemical shifts ( $\delta$ , ppm from TSP) of p53-E18-D20-E24-E25 (pH 4.5, 283 K)

|       | NH   | H $\alpha$   | H $\beta$ 2 | H $\beta$ 3 | H $\gamma$ 2 | H $\gamma$ 3 | H $\delta$ 2                                                              | H $\delta$ 3 | H $\epsilon$ | H $\epsilon$ | H $\zeta$ |
|-------|------|--------------|-------------|-------------|--------------|--------------|---------------------------------------------------------------------------|--------------|--------------|--------------|-----------|
| Glu17 | 8.37 | 4.23 (-0.06) |             | 1.85        |              | 2.28         |                                                                           |              |              |              |           |
| Glu18 | 8.52 | 4.21 (-0.08) |             | 1.83        |              | 2.20         |                                                                           |              |              |              |           |
| Phe19 | 8.32 | 4.56 (-0.10) | 2.98        | 3.16        |              |              | 7.22                                                                      |              | 7.34         |              |           |
| Asp20 | 8.32 | 4.56 (-0.20) |             | 2.67        |              |              |                                                                           |              |              |              |           |
| Asp21 | 8.31 | 4.55 (-0.21) |             | 2.68        |              |              |                                                                           |              |              |              |           |
| Leu22 | 8.09 | 4.19 (-0.19) |             | 1.46        |              | 1.46         | 0.80 (Me)                                                                 |              |              |              |           |
| Trp23 | 7.99 | 4.58 (-0.12) |             | 3.31        |              |              | 10.18 (NH); 7.27 (C2H); 7.47 (C7H); 7.58 (C4H); 7.18 (C5H);<br>7.27 (C6H) |              |              |              |           |
| Glu24 | 7.83 | 4.09 (-0.20) |             | 1.77        |              | 2.05         |                                                                           |              |              |              |           |
| Glu25 | 8.09 | 4.19 (-0.10) |             | 1.93        |              | 2.34         |                                                                           |              |              |              |           |
| Leu26 | 8.24 | 4.56 (0.18)  |             | 1.58        |              | 1.58         | 0.88 (Me)                                                                 |              |              |              |           |
| Pro27 |      | 4.41 (-0.03) |             | 2.05        |              | 2.31         | 3.66                                                                      | 3.83         |              |              |           |
| Glu28 | 8.70 | 4.21 (-0.01) |             | 1.97        |              | 2.34         |                                                                           |              |              |              |           |
| Asn29 | 8.44 | 4.68 (-0.07) |             | 2.75        |              |              |                                                                           |              |              |              |           |



Table S9: Chemical shifts ( $\delta$ , ppm from TSP) of p53-E18-E20 (pH 4.5, 283 K)

|       | NH   | H $\alpha$   | H $\beta$ 2 | H $\beta$ 3 | H $\gamma$ 2 | H $\gamma$ 3 | H $\delta$ 2                                                             | H $\delta$ 3 | H $\epsilon$ | H $\epsilon$ | H $\zeta$ |
|-------|------|--------------|-------------|-------------|--------------|--------------|--------------------------------------------------------------------------|--------------|--------------|--------------|-----------|
| Glu17 | 8.43 | 4.19 (-0.10) | 1.90        |             | 2.31         |              |                                                                          |              |              |              |           |
| Glu18 | 8.65 | 4.21 (-0.08) | 1.84        | 2.07        | 2.19         |              |                                                                          |              |              |              |           |
| Phe19 | 8.26 | 4.60 (-0.06) | 3.00        | 3.16        |              |              | 7.27                                                                     |              | 7.32         |              |           |
| Glu20 | 8.21 | 4.19 (-0.10) | 1.94        |             | 2.29         |              |                                                                          |              |              |              |           |
| Asp21 | 8.34 | 4.51 (-0.25) | 2.57        |             |              |              |                                                                          |              |              |              |           |
| Leu22 | 8.06 | 4.07 (-0.31) | 1.52        |             | 1.38         |              | 0.83 (Me)                                                                |              |              |              |           |
| Trp23 | 7.94 | 4.52 (-0.18) | 3.32        |             |              |              | 10.22 (NH); 7.29 (C2H); 7.48 (C7H); 7.58 (C4H); 7.18 (C5H);<br>7.27(C6H) |              |              |              |           |
| Lys24 | 7.60 | 4.05 (-0.31) | 1.58        |             | 1.09         |              |                                                                          |              | 2.90         |              |           |
| Leu25 | 7.89 | 4.29 (-0.09) | 1.60        |             | 1.60         |              | 0.83 (Me)                                                                |              |              |              |           |
| Leu26 | 8.02 | 4.58 (0.20)  | 1.62        |             | 1.62         |              | 0.89 (Me)                                                                |              |              |              |           |
| Pro27 |      | 4.37 (-0.07) | 2.03        |             | 2.29         |              | 3.68                                                                     | 3.84         |              |              |           |
| Glu28 | 8.75 | 4.21 (-0.08) | 2.00        |             | 2.31         |              |                                                                          |              |              |              |           |
| Asn29 | 8.41 | 4.70 (-0.05) | 2.79        |             |              |              |                                                                          |              |              |              |           |

Table S10: Chemical shifts ( $\delta$ , ppm from TSP) of p53-D18 (pH 4.5, 283 K)

|       | NH   | H $\alpha$   | H $\beta$ 2 | H $\beta$ 3 | H $\gamma$ 2 | H $\gamma$ 3 | H $\delta$ 2 | H $\delta$ 3                                                             | H $\epsilon$ | H $\epsilon$ | H $\zeta$ |
|-------|------|--------------|-------------|-------------|--------------|--------------|--------------|--------------------------------------------------------------------------|--------------|--------------|-----------|
| Glu17 | 8.36 | 4.17 (-0.12) |             | 1.86        |              | 2.25         |              |                                                                          |              |              |           |
| Asp18 | 8.46 | 4.58 (-0.18) |             | 2.65        |              |              |              |                                                                          |              |              |           |
| Phe19 | 8.35 | 4.56 (-0.10) | 3.00        | 3.18        |              |              |              | 7.22                                                                     |              | 7.32         |           |
| Ser20 | 8.28 | 4.23 (-0.27) |             | 3.85        |              |              |              |                                                                          |              |              |           |
| Asp21 | 8.30 | 4.60 (-0.16) |             | 2.63        |              |              |              |                                                                          |              |              |           |
| Leu22 | 7.97 | 4.09 (-0.29) |             | 1.48        |              | 1.48         |              | 0.83 (Me)                                                                |              |              |           |
| Trp23 | 7.90 | 4.56 (-0.14) |             | 3.32        |              |              |              | 10.23 (NH); 7.29 (C2H); 7.49 (C7H); 7.58 (C4H); 7.18 (C5H);<br>7.28(C6H) |              |              |           |
| Lys24 | 7.56 | 4.01 (-0.35) |             | 1.63        |              | 1.06         |              |                                                                          |              | 2.90         |           |
| Leu25 | 7.89 | 4.29 (-0.09) |             | 1.62        |              | 1.62         |              | 0.89 (Me)                                                                |              |              |           |
| Leu26 | 8.00 | 4.60 (0.22)  |             | 1.62        |              | 1.62         |              | 0.93 (Me)                                                                |              |              |           |
| Pro27 |      | 4.39 (-0.05) |             | 1.98        |              | 2.32         |              | 3.66                                                                     | 3.84         |              |           |
| Glu28 | 8.75 | 4.25 (-0.04) |             | 2.00        |              | 2.35         |              |                                                                          |              |              |           |
| Asn29 | 8.41 | 4.68 (-0.07) |             | 2.77        |              |              |              |                                                                          |              |              |           |

Table S11: Chemical shifts ( $\delta$ , ppm from TSP) of p53-E20 (pH 4.5, 283 K)

|       | NH   | H $\alpha$   | H $\beta$ 2 | H $\beta$ 3 | H $\gamma$ 2 | H $\gamma$ 3 | H $\delta$ 2                                                             | H $\delta$ 3 | H $\epsilon$ | H $\epsilon$ | H $\zeta$ |
|-------|------|--------------|-------------|-------------|--------------|--------------|--------------------------------------------------------------------------|--------------|--------------|--------------|-----------|
| Glu17 | 8.45 | 4.28 (-0.01) | 1.87        |             | 2.27         |              |                                                                          |              |              |              |           |
| Thr18 | 8.33 | 4.35 (0.0)   | 4.23        |             | 1.15 (Me)    |              |                                                                          |              |              |              |           |
| Phe19 | 8.48 | 4.48 (-0.18) | 3.02        |             |              |              | 7.22                                                                     |              | 7.34         |              |           |
| Glu20 | 8.35 | 4.13 (-0.16) | 1.92        |             | 2.22         |              |                                                                          |              |              |              |           |
| Asp21 | 8.20 | 4.46 (-0.30) | 2.60        |             |              |              |                                                                          |              |              |              |           |
| Leu22 | 8.04 | 4.04 (-0.34) | 1.49        |             | 1.35         |              | 0.82 (Me)                                                                |              |              |              |           |
| Trp23 | 7.98 | 4.50 (-0.20) | 3.31        |             |              |              | 10.20 (NH); 7.23 (C2H); 7.49 (C7H); 7.57 (C4H); 7.18 (C5H);<br>7.28(C6H) |              |              |              |           |
| Lys24 | 7.59 | 4.07 (-0.29) | 1.65        |             | 1.12         |              |                                                                          |              | 2.90         |              |           |
| Leu25 | 7.86 | 4.26 (-0.12) | 1.61        |             | 1.61         |              | 0.86 (Me)                                                                |              |              |              |           |
| Leu26 | 7.97 | 4.60 (0.22)  | 1.66        |             | 1.35         |              | 0.88 (Me)                                                                |              |              |              |           |
| Pro27 |      | 4.36 (-0.08) | 1.96        |             | 2.29         |              | 3.70                                                                     | 3.83         |              |              |           |
| Glu28 | 8.77 | 4.24 (-0.05) | 1.96        |             | 2.32         |              |                                                                          |              |              |              |           |
| Asn29 | 8.39 | 4.66 (-0.09) | 2.74        |             |              |              |                                                                          |              |              |              |           |

Table S12: Chemical shifts ( $\delta$ , ppm from TSP) of p53-D18-E20 (pH 4.5, 283 K)

|       | NH   | H $\alpha$   | H $\beta$ 2 | H $\beta$ 3 | H $\gamma$ 2 | H $\gamma$ 3 | H $\delta$ 2 | H $\delta$ 3                                                             | H $\epsilon$ | H $\epsilon$ | H $\zeta$ |
|-------|------|--------------|-------------|-------------|--------------|--------------|--------------|--------------------------------------------------------------------------|--------------|--------------|-----------|
| Glu17 | 8.39 | 4.25 (-0.04) |             | 1.79        |              | 2.26         |              |                                                                          |              |              |           |
| Asp18 | 8.52 | 4.68 (-0.08) |             | 2.67        |              |              |              |                                                                          |              |              |           |
| Phe19 | 8.28 | 4.54 (-0.12) | 3.04        | 3.10        |              |              |              | 7.25                                                                     |              | 7.37         |           |
| Glu20 | 8.31 | 4.15 (-0.14) |             | 1.93        |              | 2.26         |              |                                                                          |              |              |           |
| Asp21 | 8.16 | 4.62 (-0.14) |             | 2.55        |              |              |              |                                                                          |              |              |           |
| Leu22 | 8.01 | 4.13 (-0.25) |             | 1.48        |              | 1.33         |              | 0.76 (Me)                                                                |              |              |           |
| Trp23 | 7.96 | 4.54 (-0.16) |             | 3.29        |              |              |              | 10.22 (NH); 7.28 (C2H); 7.48 (C7H); 7.58 (C4H); 7.18 (C5H);<br>7.27(C6H) |              |              |           |
| Lys24 | 7.56 | 4.09 (-0.27) |             | 1.58        |              | 1.08         |              |                                                                          |              | 2.90         |           |
| Leu25 | 7.87 | 4.37 (-0.01) |             | 1.58        |              | 1.58         |              | 0.82 (Me)                                                                |              |              |           |
| Leu26 | 7.99 | 4.66 (0.28)  |             | 1.56        |              | 1.56         |              | 0.86 (Me)                                                                |              |              |           |
| Pro27 |      | 4.37 (-0.07) |             | 2.04        |              | 2.30         |              | 3.68                                                                     | 3.84         |              |           |
| Glu28 | 8.75 | 4.23 (-0.06) |             | 1.97        |              | 2.34         |              |                                                                          |              |              |           |
| Asn29 | 8.41 | 4.74 (-0.01) |             | 2.75        |              |              |              |                                                                          |              |              |           |

Table S13: Chemical shifts ( $\delta$ , ppm from TSP) of p53-D18-D20 (pH 4.5, 283 K)

|       | NH   | H $\alpha$   | H $\beta$ 2 | H $\beta$ 3 | H $\gamma$ 2 | H $\gamma$ 3 | H $\delta$ 2 | H $\delta$ 3                                                             | H $\epsilon$ | H $\epsilon$ | H $\zeta$ |
|-------|------|--------------|-------------|-------------|--------------|--------------|--------------|--------------------------------------------------------------------------|--------------|--------------|-----------|
| Glu17 | 8.38 | 4.22 (-0.07) |             | 1.84        |              | 2.26         |              |                                                                          |              |              |           |
| Asp18 | 8.50 | 4.61 (-0.15) |             | 2.71        |              |              |              |                                                                          |              |              |           |
| Phe19 | 8.30 | 4.53 (-0.13) | 3.05        | 3.14        |              |              | 7.22         |                                                                          | 7.30         |              |           |
| Asp20 | 8.36 | 4.55 (-0.21) |             | 2.71        |              |              |              |                                                                          |              |              |           |
| Asp21 | 8.17 | 4.55 (-0.21) |             | 2.67        |              |              |              |                                                                          |              |              |           |
| Leu22 | 8.09 | 4.10 (-0.28) |             | 1.55        |              | 1.37         |              | 0.81 (Me)                                                                |              |              |           |
| Trp23 | 7.95 | 4.53 (-0.17) |             | 3.31        |              |              |              | 10.22 (NH); 7.27 (C2H); 7.47 (C7H); 7.58 (C4H); 7.18 (C5H);<br>7.27(C6H) |              |              |           |
| Lys24 | 7.53 | 4.09 (-0.27) |             | 1.58        |              | 1.06         |              |                                                                          |              | 2.93         |           |
| Leu25 | 7.89 | 4.26 (-0.12) |             | 1.61        |              | 1.60         |              | 0.91 (Me)                                                                |              |              |           |
| Leu26 | 8.01 | 4.61 (0.23)  |             | 1.66        |              | 1.60         |              | 0.89 (Me)                                                                |              |              |           |
| Pro27 |      | 4.35 (-0.09) |             | 2.02        |              | 2.30         |              | 3.67                                                                     | 3.84         |              |           |
| Glu28 | 8.76 | 4.26 (-0.03) |             | 2.03        |              | 2.38         |              |                                                                          |              |              |           |
| Asn29 | 8.42 | 4.68 (-0.07) |             | 2.75        |              |              |              |                                                                          |              |              |           |

## SUPPLEMENTARY FIGURES

**FIGURE 1: TFE titrations monitored by CD:** (A) The far-UV CD spectra of selected peptides in aqueous solution (50 mM phosphate buffer, pH 6.8) at 5 °C. (B) Main panel: TFE titration for p53-E18-D20 at 5 °C (50 mM phosphate buffer, pH 6.8). The line is the fit of the data to a two-state equation<sup>32,33</sup>. Inset: Far-UV CD spectra of p53-E18-D20 at different TFE concentrations; the arrow indicates the increasing concentration of TFE.

**FIGURE 2: Far-UV CD spectrum of p53-E18-D20-E24-E25:** The far-UV CD spectra of the quadruple mutant in aqueous solution (50 mM phosphate buffer, pH 6.8) at 5 °C.

**FIGURE 3: NMR structural characterization of selected p53 peptides:** NOEs are classified into strong, medium or weak according to the height of the bar underneath the sequence; signal intensity was judged by visual inspection from the ROESY experiments with 200 ms of mixing time. The corresponding  $H_{\alpha}$  NOEs with the following  $H_{\delta}$  of a proline residue are indicated by an open bar in the row corresponding to the  $\alpha N(i, i+1)$  contacts. The dotted lines indicate NOE contacts which could not be unambiguously assigned due to signal overlap or diagonal proximity of the chemical shifts. The numbering of residues corresponds to that of the whole sequence of p53.

**FIGURE 4: Chemical shifts of the peptides calculated from the REMD simulations:** Experimental values are shown in red (from the Tables above), and those calculated from simulation are in blue. We used the program SPARTA<sup>36</sup> to calculate chemical shifts from the simulations. The values shown are the mean values for each residue from 3000 structures collected from 300 ns of simulation data.

**FIGURE 5: Ramachandran plots (x-axis:  $\phi$ , y-axis:  $\psi$ ) of phosphorylated residues:** The plots show how the dihedral angle distribution of residues in phosphorylated residues changes with their conformation in p53-WT. The colour bars indicate the populations, with blue indicating highest density and yellow lowest density of structures.

**FIGURE 6: Conformational landscapes of the peptides containing the phosphomimics:** 2D FES surfaces of p53-WT and peptides containing phosphomimics sampled during the REMD simulations. The X-axis shows the RMSD of each conformation of a peptide calculated from the bound form of the WT peptide from the crystal structure 1YCR<sup>16</sup>. The Y-axis shows the radius of gyration ( $R_g$ ) of the peptide. Representative structures from significantly populated clusters are shown in a cartoon format. Key binding residues Phe19, Trp23 and Leu26 are shown as sticks. The colours represent the populations of the peptide conformations and the color scheme used is shown on the right side; blue and yellow correspond to the highest and lowest density of conformations sampled in our REMD simulations.

**FIGURE 7: Equilibrium fluorescence binding titrations:** Binding monitored by fluorescence (the difference in fluorescence intensity of p53 peptide in complex relative to uncomplexed peptide) for (A) p53-PSpT and (B) p53-pS. The line through the experimental data is the fit of the data to equation (1). Experiments were carried out at 15 °C.

**FIGURE 8: Fluorescence spectra of the equilibrium binding titrations:** Fluorescence spectra (without subtraction of the spectrum of the corresponding isolated peptide) of the titration for p53-pT. Experiments were carried out at 15 °C.

Fig. S1 (Yadahalli et al)

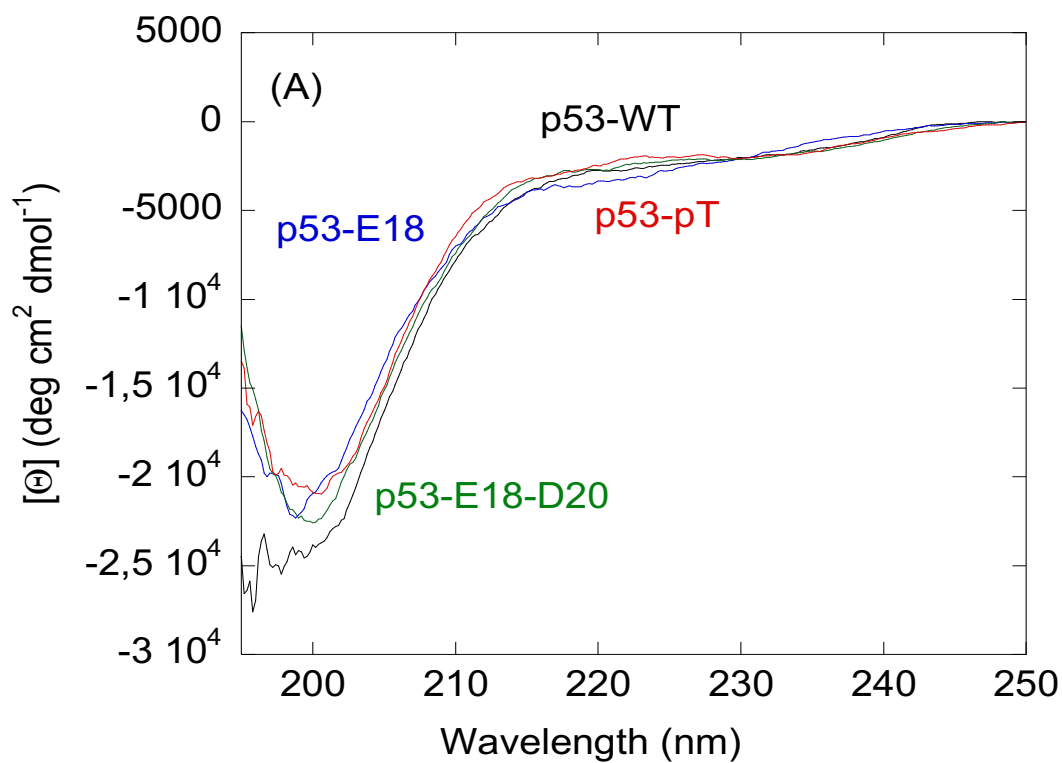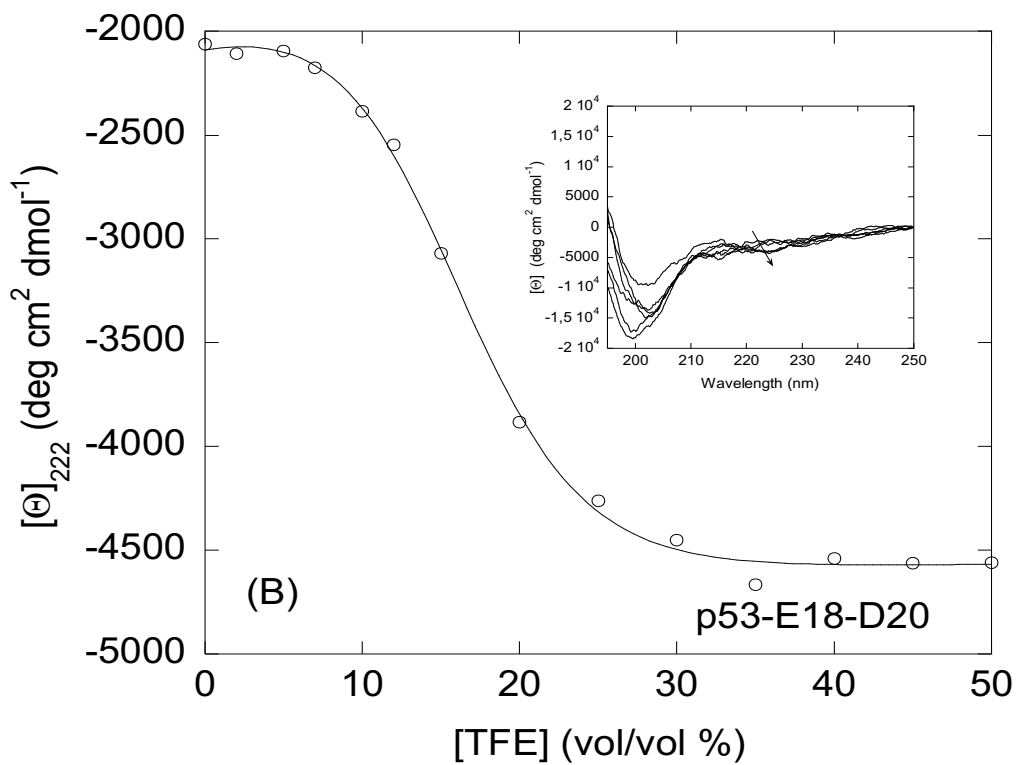



Fig. S2 (Yahadalli et al)

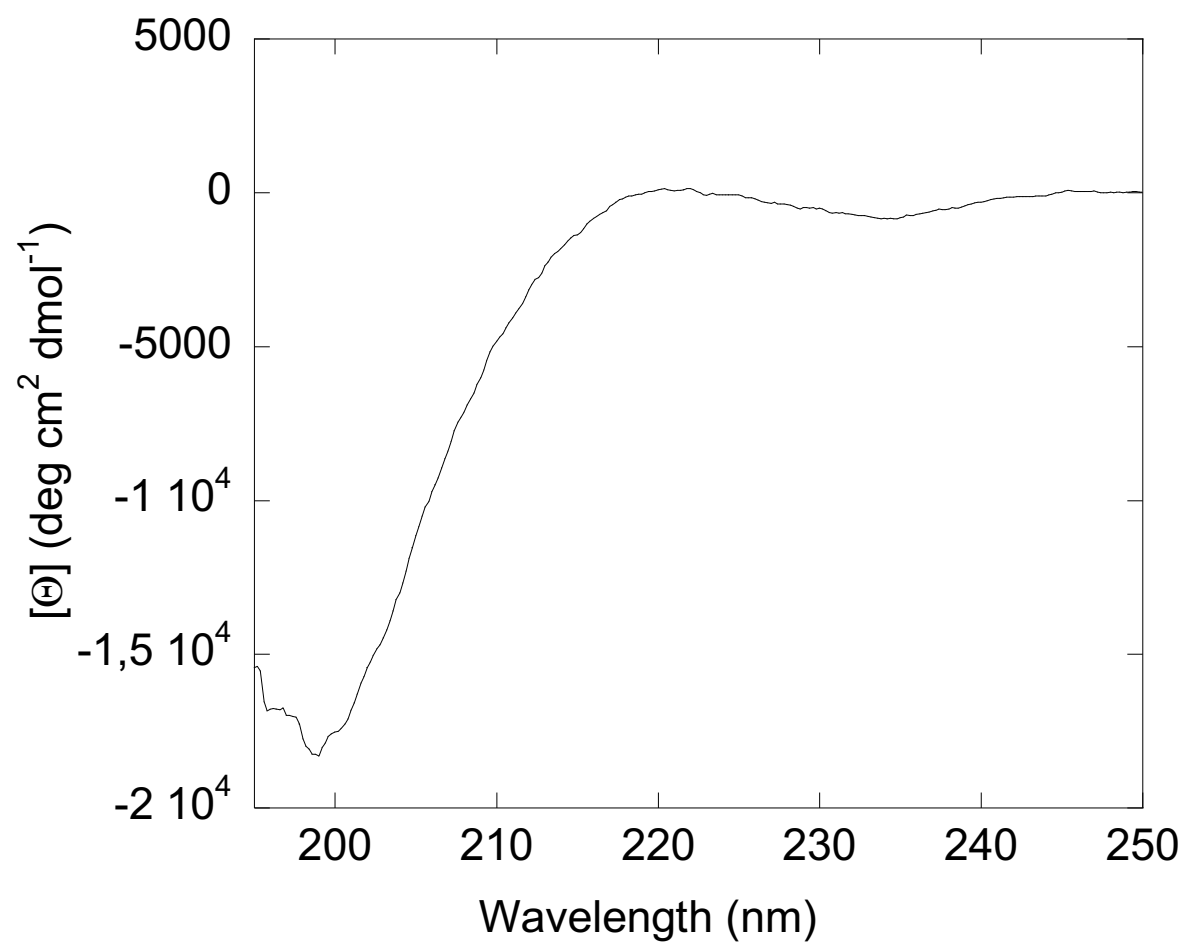

Fig. S3 (Yadahalli et al)

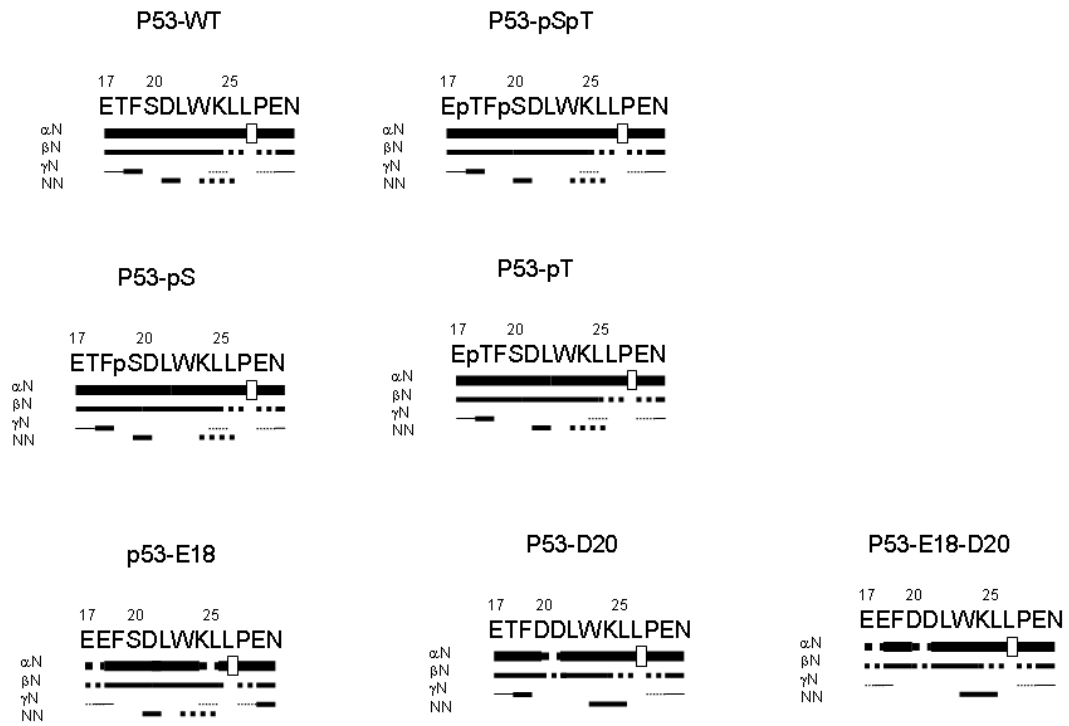

Fig. S4 (Yadahalli et al.)

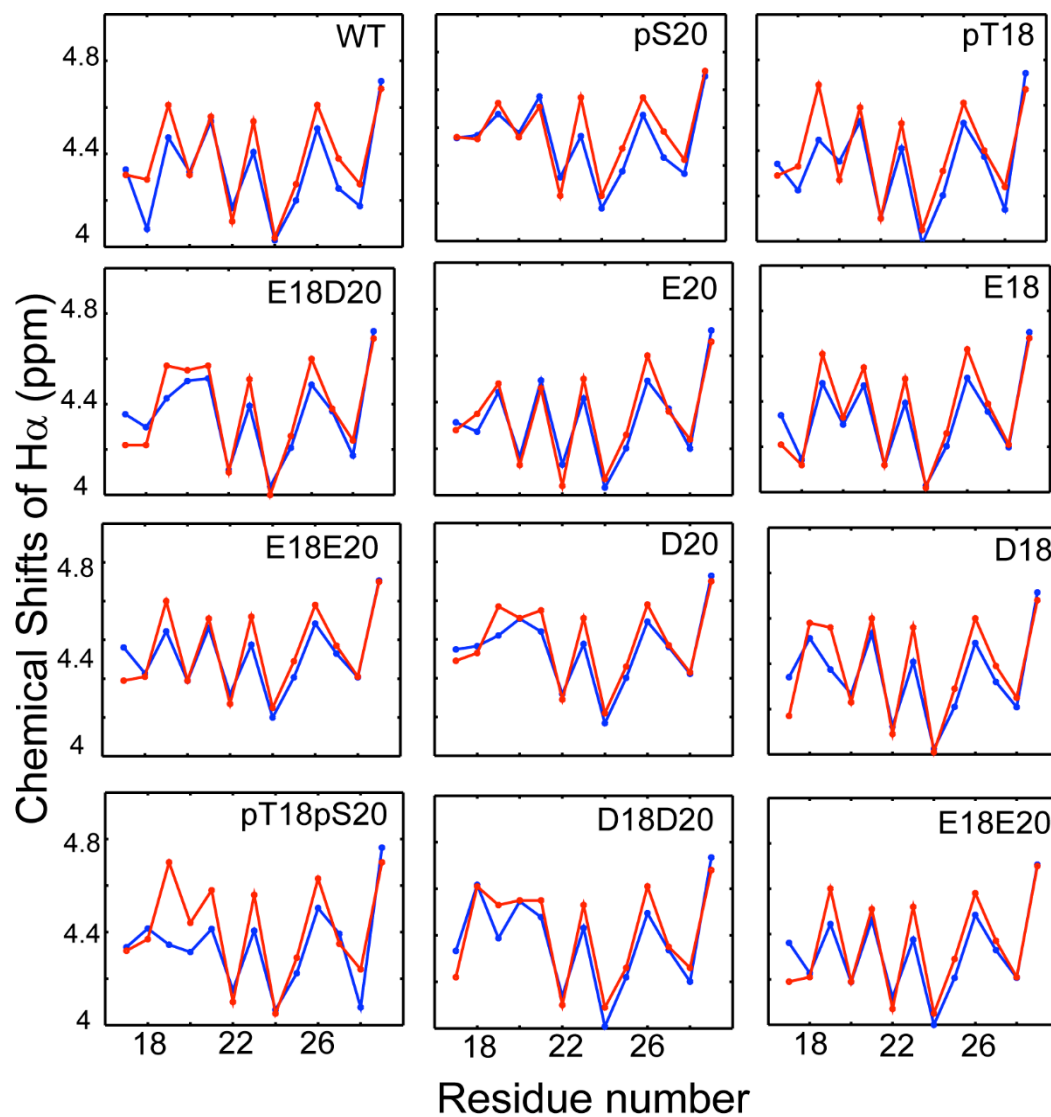

Fig. S5 (Yadahalli et al.)

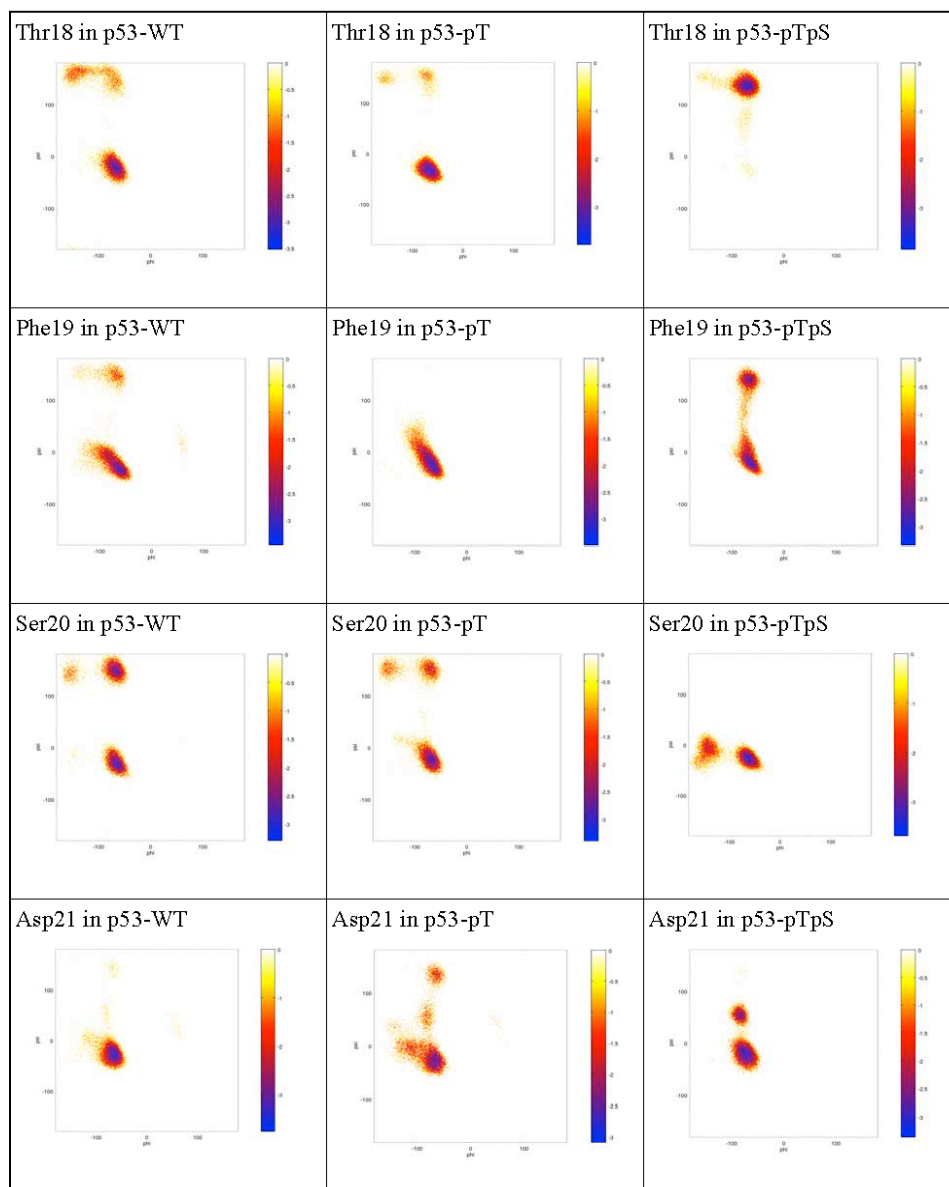

Fig. S6 (Yadahalli et al.)

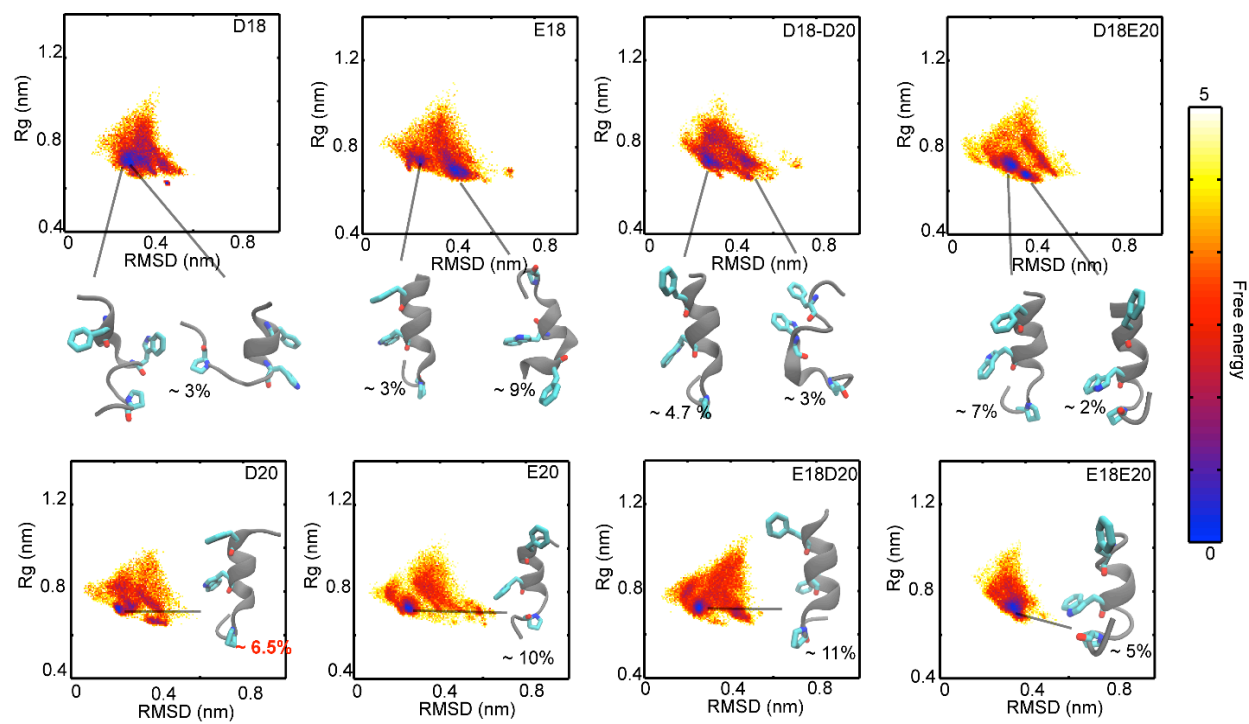

Fig. S7 (Yadahalli et al)

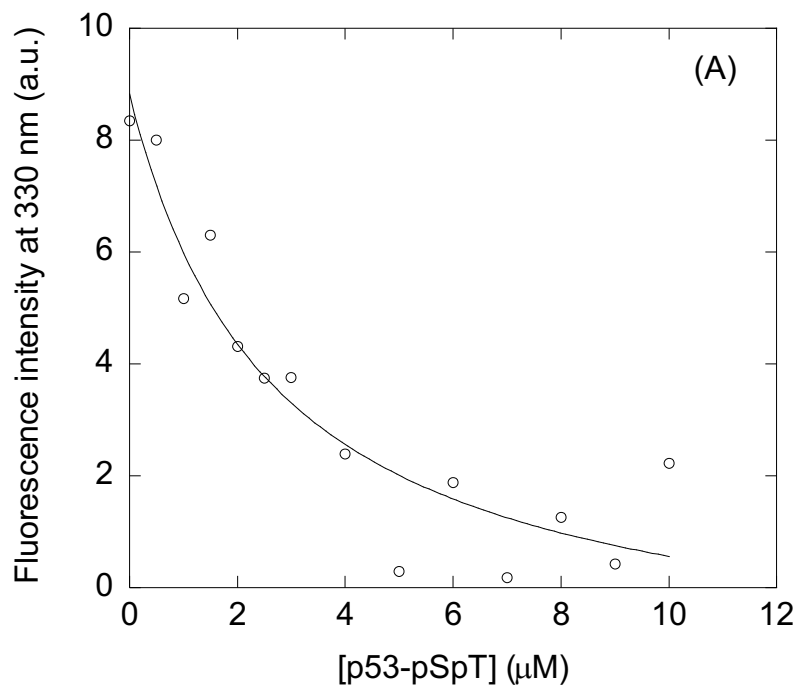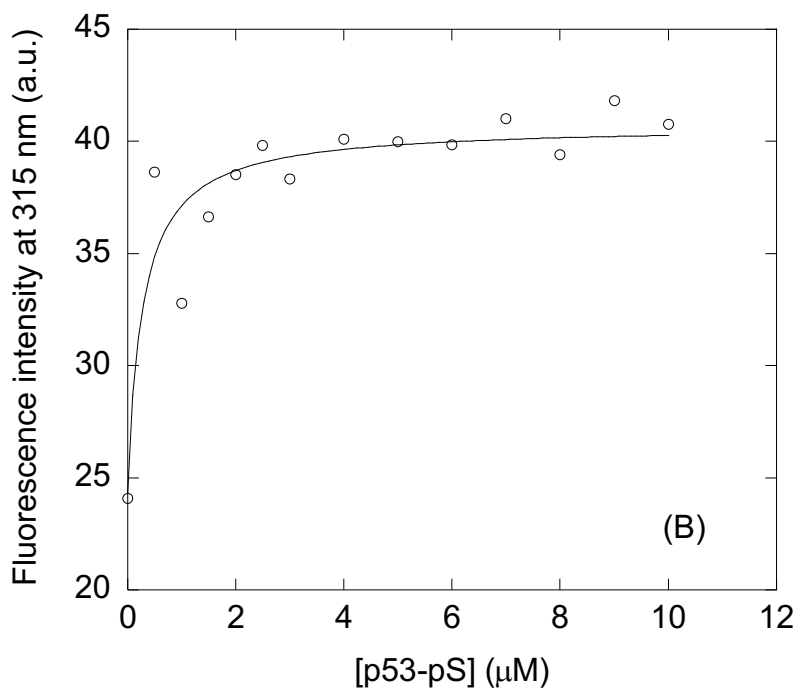

Fig. S8 (Yadahalli et al)

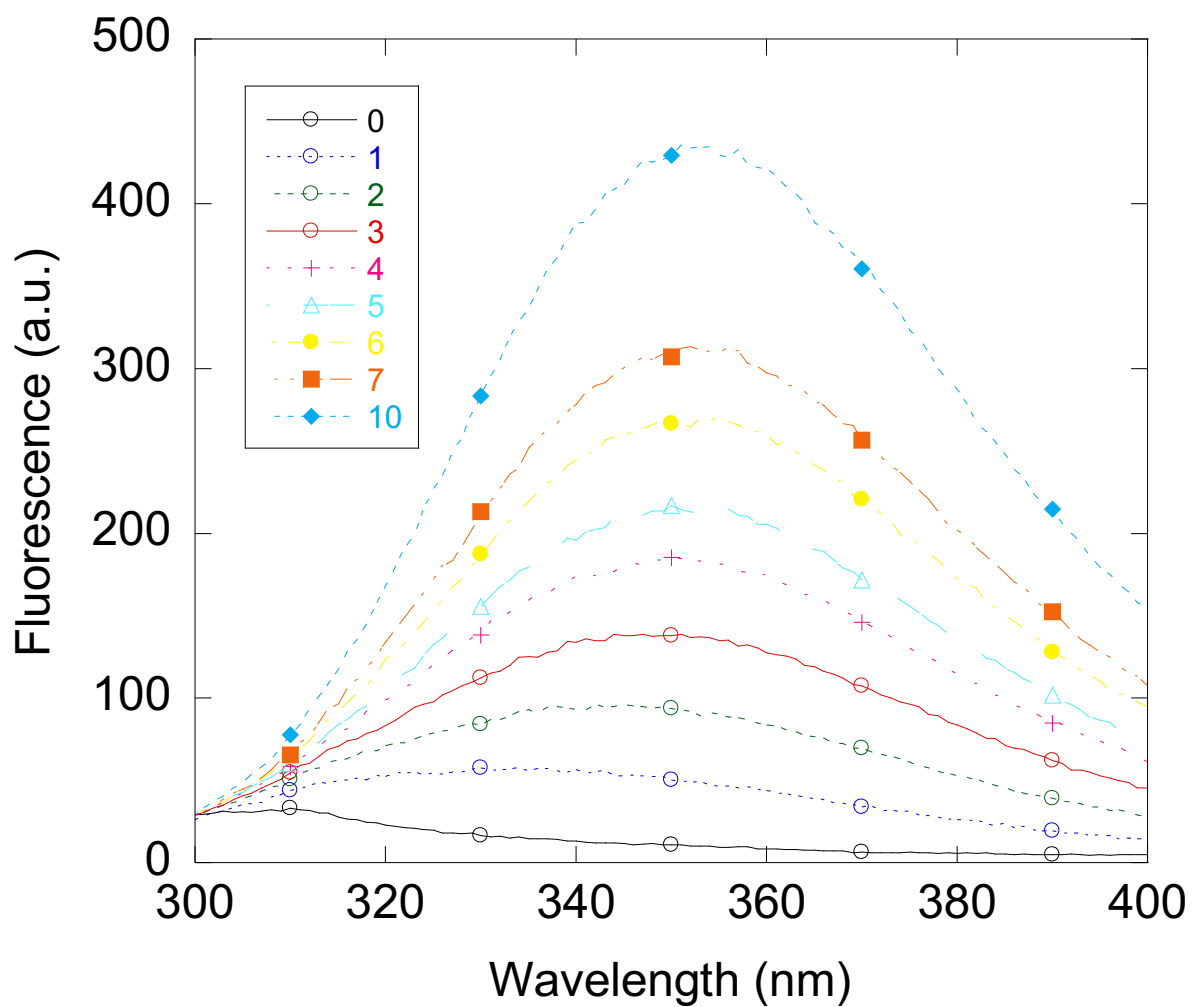

Supplement: 41598_2018_36589_MOESM1_ESM.pdf [file 41598_2018_36589_MOESM1_ESM.pdf]
